# Supplementary material
Source: publisher figshare collection journal article supplement (https://acs.figshare.com/ndownloader/files/9306364)
Supplement: Supplementary file 1 [file 9306364]

## Supporting Information

### Multivariate Curve Resolution for Signal Isolation from Fast-Scan Cyclic Voltammetric Data

Justin A. Johnson<sup>†</sup>, Josh H. Gray<sup>†</sup>, Nathan T. Rodeberg, and R. Mark Wightman<sup>\*,†,‡</sup>

<sup>†</sup>Department of Chemistry and <sup>‡</sup>Neuroscience Center and Neurobiology Curriculum, University of North Carolina at Chapel Hill, Chapel Hill, North Carolina 27599-3290, United States

\*Corresponding Author: Phone: 919-962-1472. E-mail: rmw@unc.edu

#### Table of Contents:

Table S-1: Rank estimated by Malinowski's F-Test, orthogonal projection approach, and the evolving factor analysis approach for different simulated time separations of 8-second dopamine and pH boluses.

Figure S-1: Effect of the weighting parameter  $w$  on the MCR-ALS fits to isolated injections of dopamine and pH.

**Table S-1.** Rank estimated by Malinowski's F-Test, orthogonal projection approach, and the evolving factor analysis approach for different simulated time separations of 8-second dopamine and pH boluses

|                                  | Analyte Onset Separation (sec) |          |          |          |          |          |          |          |          |          |          |          |          |          |
|----------------------------------|--------------------------------|----------|----------|----------|----------|----------|----------|----------|----------|----------|----------|----------|----------|----------|
|                                  | 0                              |          | 2        |          | 4        |          | 6        |          | 8        |          | 10       |          | 12       |          |
|                                  | <i>I</i>                       | <i>T</i> | <i>I</i> | <i>T</i> | <i>I</i> | <i>T</i> | <i>I</i> | <i>T</i> | <i>I</i> | <i>T</i> | <i>I</i> | <i>T</i> | <i>I</i> | <i>T</i> |
| <b>Malinowski's F-Test (99%)</b> | 3                              | 8        | 4        | 8        | 4        | 8        | 4        | 8        | 5        | 8        | 6        | 8        | 6        | 8        |
| <b>OPA</b>                       | 2                              | 2        | 2        | 2        | 2        | 2        | 2        | 2        | 2        | 2        | 2        | 2        | 2        | 2        |
| <b>EFA</b>                       | 2                              | 2        | 2        | 2        | 2        | 2        | 2        | 2        | 2        | 2        | 2        | 2        | 2        | 2        |

\*I = analysis of data window containing injections; T = analysis of entire 50-second data window

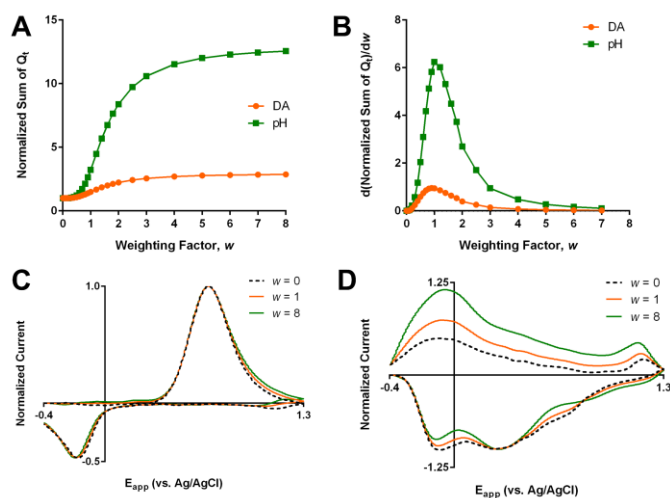

Figure S-1. Effect of the weighting parameter  $w$  on the MCR-ALS fits to isolated injections of dopamine and pH (A-B) Sum of the squares of the residual (A, normalized to value for  $w = 0$ ) and its derivative plot (B) as a function of the weighting parameter  $w$  for the dopamine (orange) and pH (green) data. (C-D) MCR-ALS spectral estimates for dopamine (C) and pH (D) data at different values of  $w$ .
